# Supplementary material for: Holocene wildfire regimes in western Siberia: interaction between peatland moisture conditions and the composition of plant functional types
Source: Copernicus journal article supplement (doi:10.5194/cp-18-1255-2022), 2022-06-03
Supplement: Supplementary file 1 [file cp-18-1255-2022-supplement.zip]

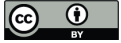

*Supplement of*

## **Holocene wildfire regimes in western Siberia: interaction between peatland moisture conditions and the composition of plant functional types**

**Angelica Feurdean et al.**

*Correspondence to:* Angelica Feurdean (feurdean@em.uni-frankfurt.de, angelica.feurdean@gmail.com)

- cp-18-1255-2022-supplement-title-page.pdf
- Feurdean\_Siberia\_SI\_revised\_2204202.docx
- FileS5.xlsx

The copyright of individual parts of the supplement might differ from the article licence.
